# Supplementary material for: Influence of magnetic ordering and Jahn–Teller distortion on the lithiation process of LiMn2O4
Source: Royal Society of Chemistry journal article supplement (doi:10.1039/c6cp08324b), 2017-01-01
Supplement: c6cp08324b1.pdf [file c6cp08324b1.pdf]

## Supplementary Information

### Influence of Magnetic Ordering and Jahn-Teller Distortion on the Lithiation Process of $\text{LiMn}_2\text{O}_4$

WeiWei Liu<sup>1</sup>, Da Wang<sup>1</sup>, Zhifan Wang<sup>3</sup>, Jianguo Deng<sup>5,6</sup>, Woon-Ming Lau<sup>4\*</sup>, Yan-  
Ning Zhang<sup>2,1\*</sup>

<sup>1</sup>Beijing Computational Science Research Center, Beijing 100193, China

<sup>2</sup>School of Energy Science and Engineering, University of Electronic Science and  
Technology of China, Chengdu 611731, China

<sup>3</sup>Chengdu Science and Technology Development Center of CAEP, Chengdu, Sichuan,  
610207, China

<sup>4</sup>School of Mathematics and Physics University of Science and Technology Beijing,  
Beijing 100083, China

<sup>5</sup>Sichuan New Material Research Center, Chengdu, 610207, Sichuan, China

<sup>6</sup>Institute of Chemical Materials, China Academy of Engineering Physics, Mianyang,  
621900, Sichuan, China

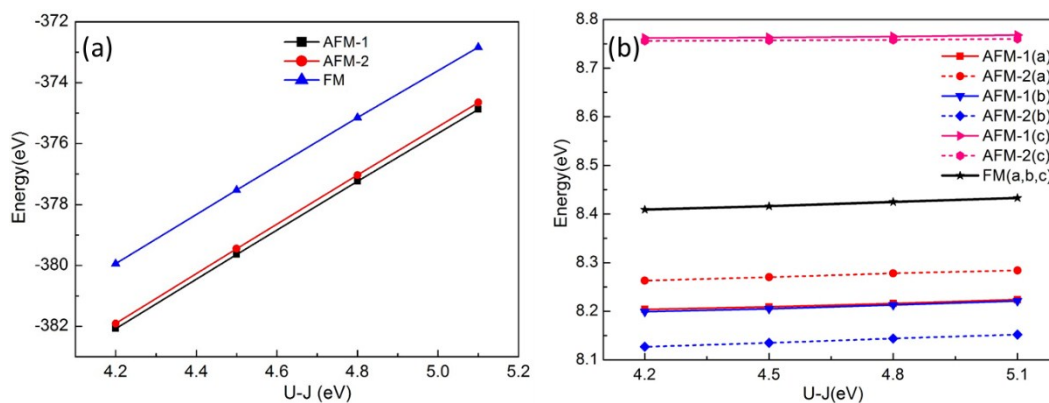

Figure S1 Calculations of (a) energies and (b) lattice constants as a dependence of  $U-J=4.2, 4.5, 4.8, 5.1$  eV for AFM-1, AFM-2 and FM configurations.

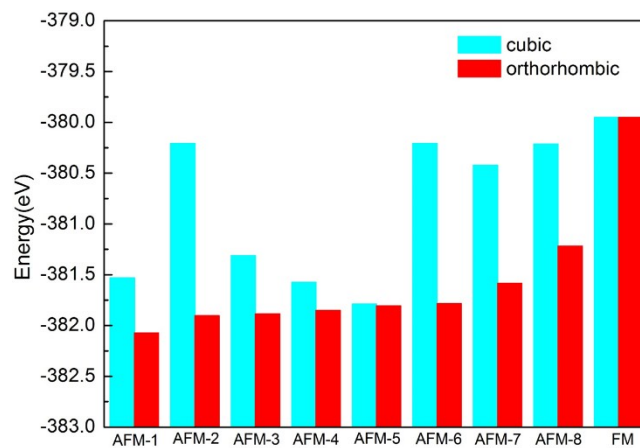

Figure S2 Energies of AFM and FM LMO structures in the cubic phase (cyan) and the orthorhombic phase (red).

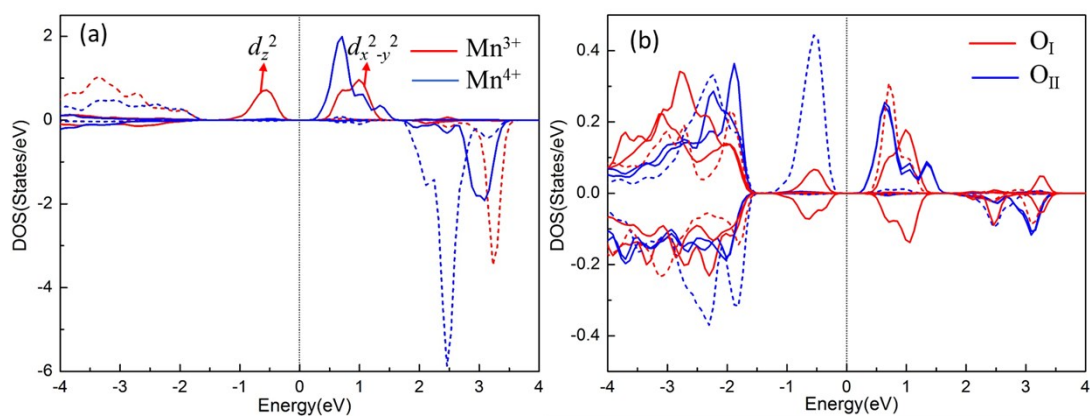

Figure S3 Projected density of state of Mn-3d (a) and O-2p (b) states in AFM-1. The solid and dashed lines in the left panel represent Mn- $e_g$  and  $-t_{2g}$  orbitals, respectively. The solid and dashed lines in the right panel represent O- $p_{x,y}$  and  $-p_z$  orbitals, respectively. Zero energy denotes the position of the Fermi level.
